# Supplementary material for: Improving the piezoelectric strain and anti-reduction properties of K0.5Na0.5NbO3-based ceramics sintered in a reducing atmosphere
Source: Royal Society of Chemistry journal article supplement (doi:10.1039/d1dt01059j), 2021-01-01
Supplement: d1dt01059j1.pdf [file d1dt01059j1.pdf]

### Support material

Improving piezoelectric strain and anti-reduction properties on  $K_{0.5}Na_{0.5}NbO_3$ -based  
ceramics sintered in reducing atmosphere

Zhenyong Cen, Ze Xu, Longtu Li and Xiaohui Wang\*

State Key Laboratory of New Ceramics and Fine Processing, School of Materials

Science and Engineering, Tsinghua University, Beijing 100084, China

\* Corresponding author.

E-mail: [wxh@tsinghua.edu.cn](mailto:wxh@tsinghua.edu.cn)

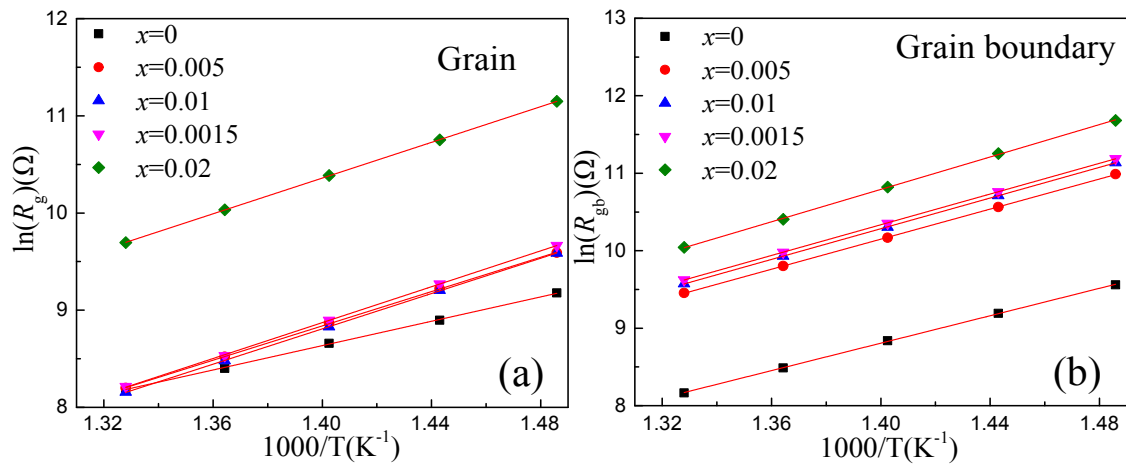

Fig.S1 Arrhenius plots for the resistances  $R_g$  (grain) and  $R_{gb}$  (grain boundary) of

0.945KNNT-0.055BZ+6Mn+ $x$ Zr ceramics.
